# Supplementary figures and images for: Norovirus detection in water samples at the level of single virus copies per microliter using a smartphone-based fluorescence microscope
Source: Springer Nature journal article supplement (doi:10.1038/s41596-020-00460-7), 2021-01-29

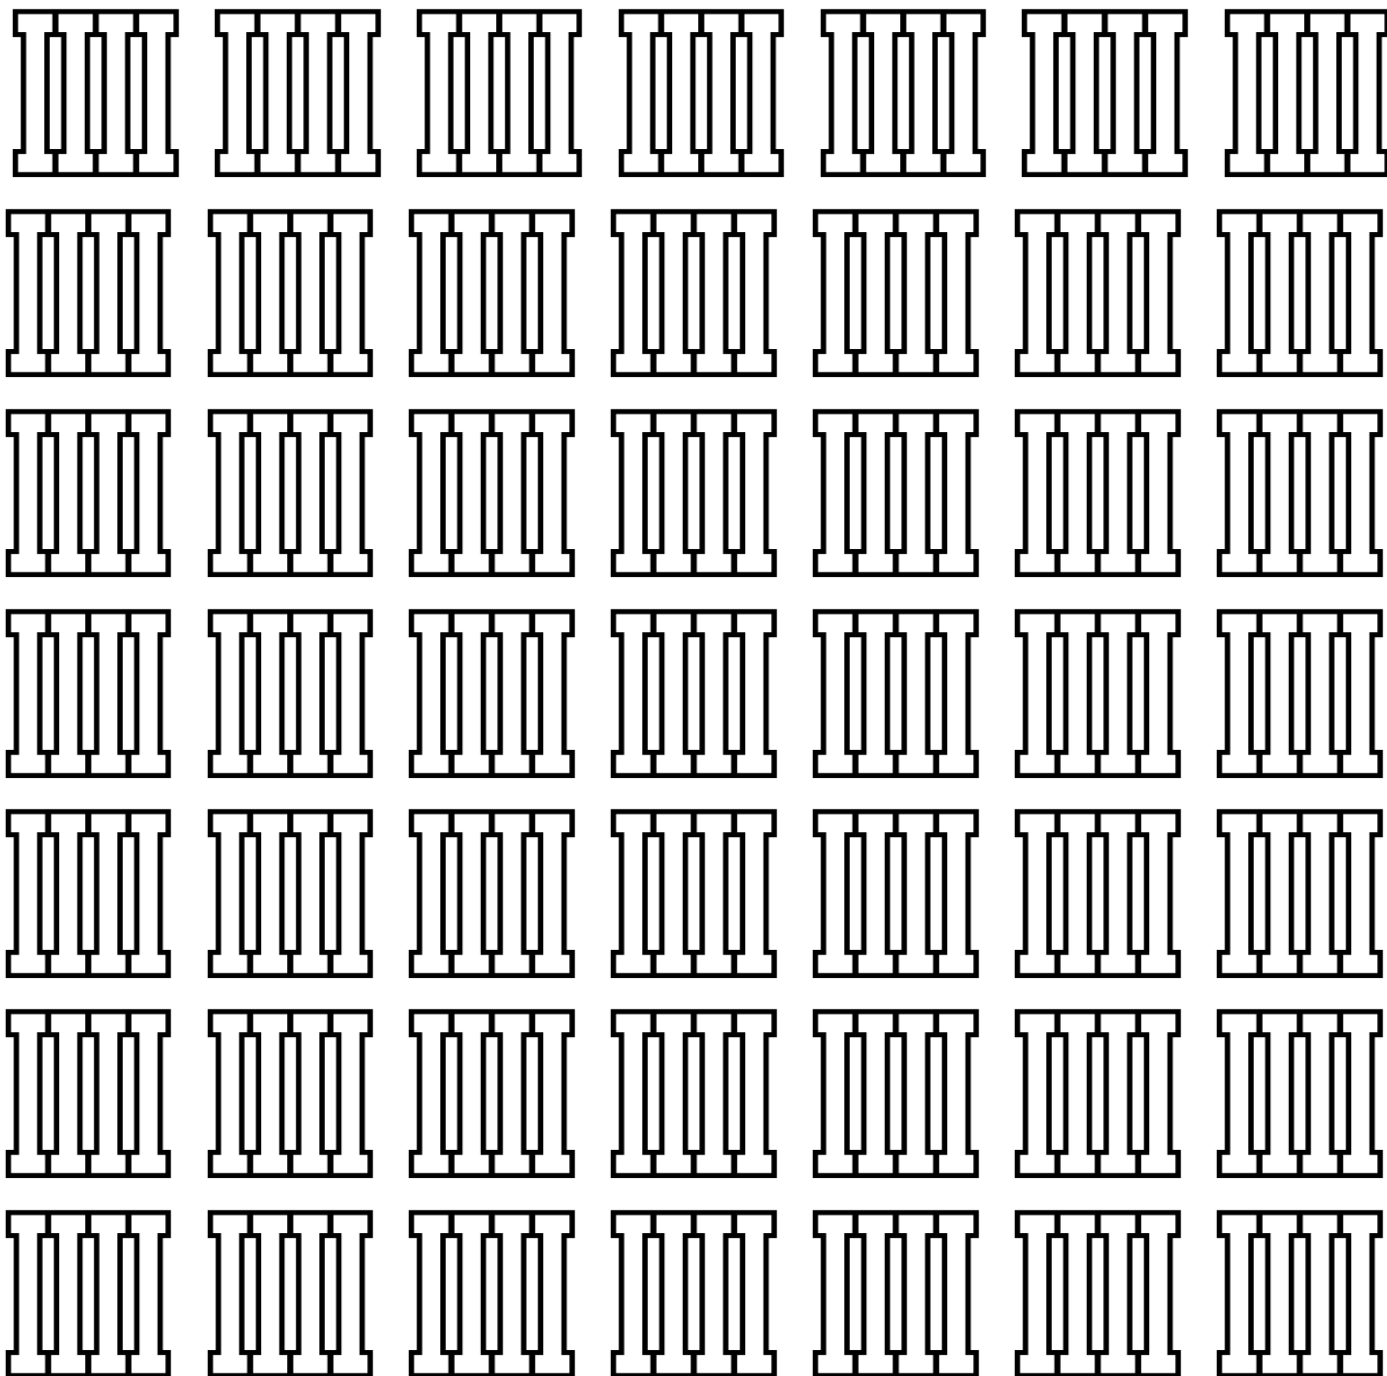

Supplement: MOESM3 [file 41596_2020_460_MOESM3_ESM24.zip]
